# Supplementary material for: Split Tummy Exercise Program for Reducing Diastasis Recti in Postpartum Primigravidae: A Randomized Controlled Trial
Source: PubMed Central journal article supplement — Korean J Fam Med. 2023 Mar 20;44(2):102–8. doi: 10.4082/kjfm.22.0035 (PMC10040268; doi:10.4082/kjfm.22.0035), 2023-03-20

# STEP Program

*Senaman Perut Selepas Bersalin*

Split Tummy Exercise Postpartum

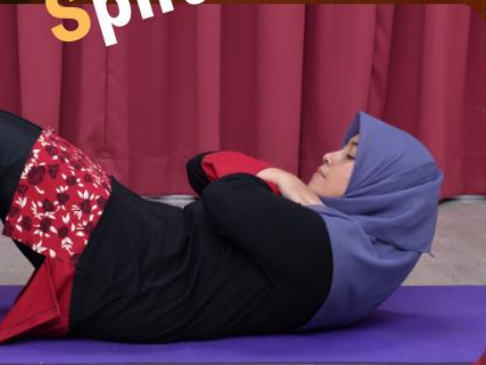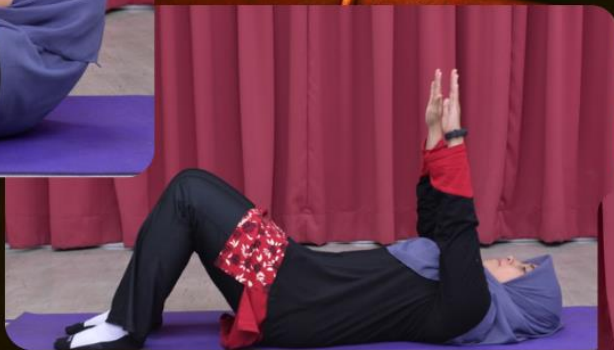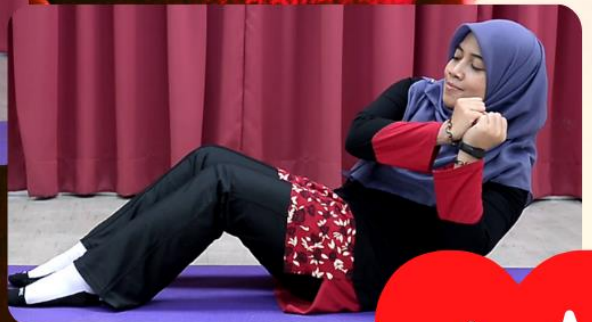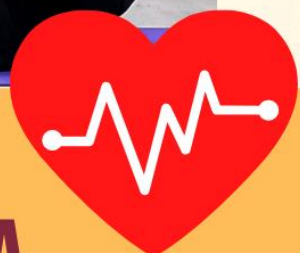

BUKU PANDUAN & NOTA

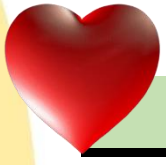

## KANDUNGAN

|                                                           |          |
|-----------------------------------------------------------|----------|
| <b>ARAHAN UMUM.....</b>                                   | <b>2</b> |
| <b>FASA 1: SENAMAN AWAL OTOT PERUT .....</b>              | <b>3</b> |
| <b>FASA 2: SENAMAN UNTUK SINAMBUNGAN OTOT PERUT .....</b> | <b>5</b> |
| <b>FASA 3: SENAMAN KEKUATAN OTOT PERUT.....</b>           | <b>7</b> |

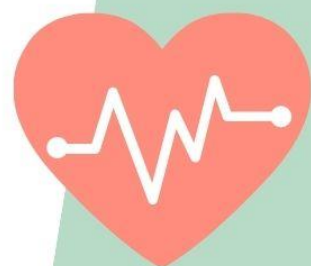

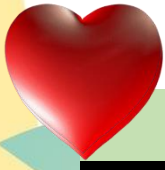

## ARAHAN UMUM

**Senaman perut ini khusus untuk ibu selepas bersalin yang mengalami masalah diastasis.**

**Diastasis adalah kondisi dimana otot perut lemah dan meregang.**

**Senaman ini mengandungi 3 fasa.**

### Ingat!

- 1. Anda perlu melakukan 3 fasa senaman perut secara berperingkat dalam tempoh 8 minggu.**
- 2. Senaman perut perlu dilakukan dalam tempoh berpantang di rumah.**
- 3. Anda perlu merekodkan aktiviti senaman di ruangan nota yang disediakan.**
- 4. Buku panduan dan nota ini perlu dibawa semasa temujanji.**

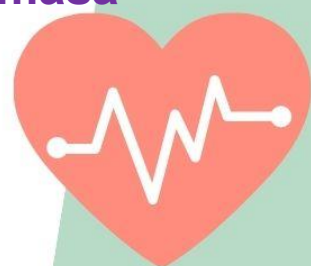

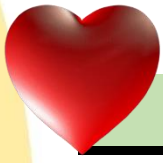

## FASA 1: SENAMAN AWAL OTOT PERUT

Lakukan 3 jenis senaman ini dari minggu pertama hingga minggu ke-4

### Senaman 1

- Baring dengan kedua kaki dibengkokkan.
- Perlahan-lahan kempiskan dan bawa otot perut ke dalam dan tahan 3 saat. Bernafas seperti biasa.
- Ulang 10 kali.

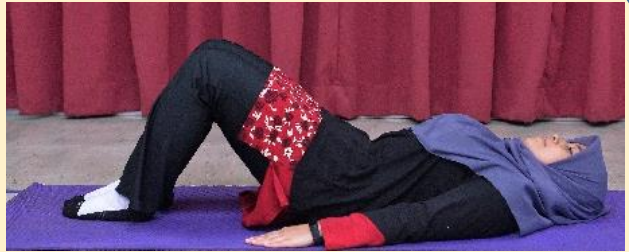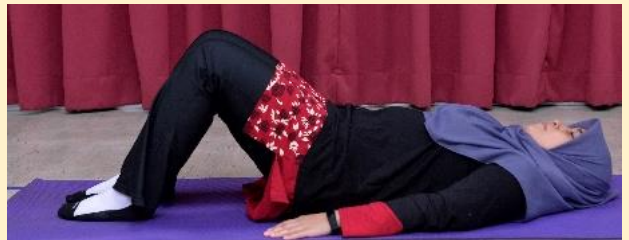

### Senaman 2

- Baring dengan kedua kaki dibengkokkan.
- Gerakkan kedua belah tangan ke atas sambil kontraksi otot perut seperti senaman 1.
- Ulang 10 kali.

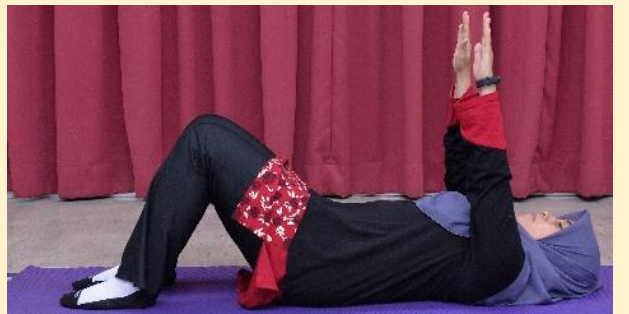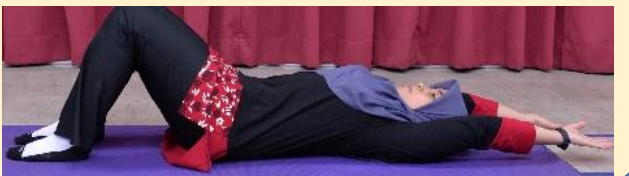

### Senaman 3

- Baring dengan kedua kaki dibengkokkan.
- Luruskan kaki secara berselang sambil memastikan kontraksi otot perut seperti senaman 1.
- Ulang 10 kali.

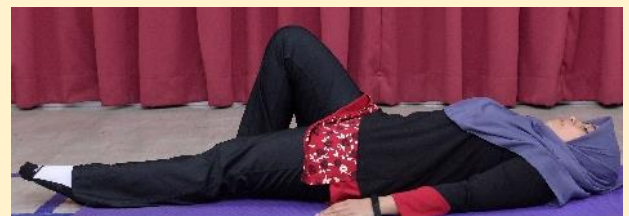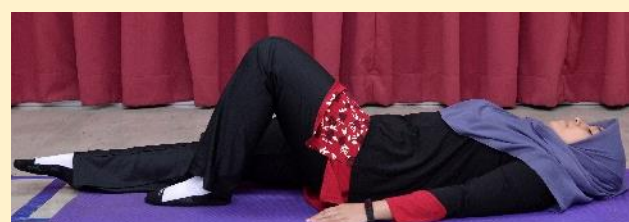

**Rekod senaman (Minima 3 kali seminggu)**

Tarikh: \_\_\_\_\_

| HARI                          | ISNIN | SELASA | RABU | KHAMIS | JUMAAT | SABTU | AHAD | MINGGU |
|-------------------------------|-------|--------|------|--------|--------|-------|------|--------|
| Tandakan ✓ hari anda bersenam |       |        |      |        |        |       |      | 1      |
| Bilangan ulangan              |       |        |      |        |        |       |      |        |
| Bilangan set                  |       |        |      |        |        |       |      |        |
| HARI                          | ISNIN | SELASA | RABU | KHAMIS | JUMAAT | SABTU | AHAD | MINGGU |
| Tandakan ✓ hari anda bersenam |       |        |      |        |        |       |      | 2      |
| Bilangan ulangan              |       |        |      |        |        |       |      |        |
| Bilangan set                  |       |        |      |        |        |       |      |        |
| HARI                          | ISNIN | SELASA | RABU | KHAMIS | JUMAAT | SABTU | AHAD | MINGGU |
| Tandakan ✓ hari anda bersenam |       |        |      |        |        |       |      | 3      |
| Bilangan ulangan              |       |        |      |        |        |       |      |        |
| Bilangan set                  |       |        |      |        |        |       |      |        |
| HARI                          | ISNIN | SELASA | RABU | KHAMIS | JUMAAT | SABTU | AHAD | MINGGU |
| Tandakan ✓ hari anda bersenam |       |        |      |        |        |       |      | 4      |
| Bilangan ulangan              |       |        |      |        |        |       |      |        |
| Bilangan set                  |       |        |      |        |        |       |      |        |

**Nota**

Anda dikira telah melakukan 1 set senaman apabila siap melakukan 3 senaman di atas. Ulang minima 3 set sehari. Rekod di dalam jadual di atas

**Temujanji fasa 2: .....**

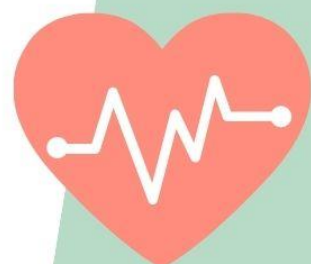

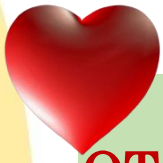

## FASA 2: SENAMAN UNTUK SINAMBUNGAN OTOT PERUT

Lakukan 3 jenis senaman ini bermula dari minggu ke-5 hingga minggu ke-6 selepas bersalin

### Senaman 1

- Baring dengan kedua kaki dibengkokkan.
- Perlahan-lahan lengkungkan belakang badan anda dan kembai ke posisi asal semula.
- Ulang 10 kali.

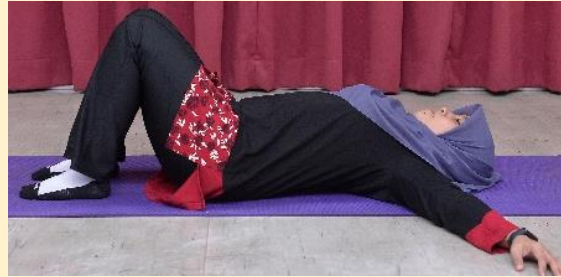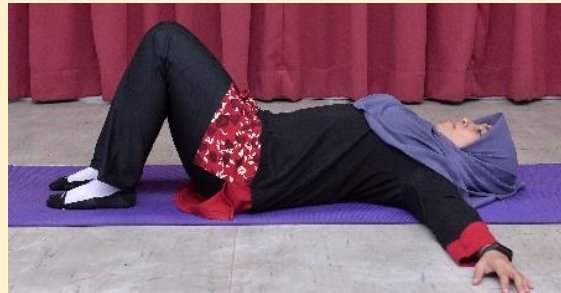

### Senaman 2

- Baring dengan kedua kaki dibengkokkan.
- Gerakkan tulang pelvis mengikut arah jam dari 6 ke 12.
- Ulang 10 kali.

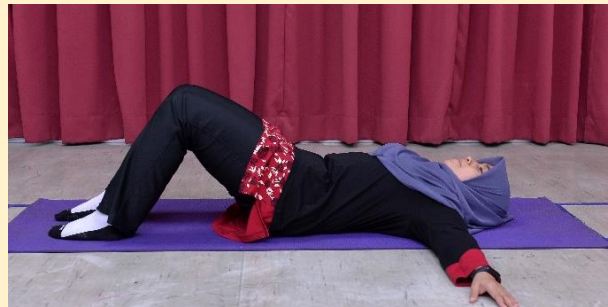

### Senaman 3

- Baring dengan kedua kaki dibengkokkan.
- Perlahan-lahan angkat punggung dan tahan 3 saat.
- Ulang 10 kali.

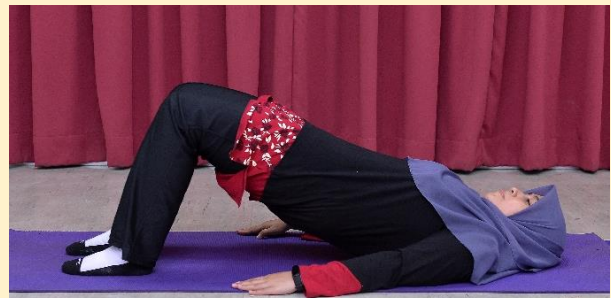

**Rekod senaman (Minima 3 kali seminggu)**

Tarikh: \_\_\_\_\_

| HARI                          | ISNIN | SELASA | RABU | KHAMIS | JUMAAT | SABTU | AHAD | MINGGU |
|-------------------------------|-------|--------|------|--------|--------|-------|------|--------|
| Tandakan ✓ hari anda bersenam |       |        |      |        |        |       |      | 5      |
| Bilangan ulangan              |       |        |      |        |        |       |      |        |
| Bilangan set                  |       |        |      |        |        |       |      |        |
| HARI                          | ISNIN | SELASA | RABU | KHAMIS | JUMAAT | SABTU | AHAD | MINGGU |
| Tandakan ✓ hari anda bersenam |       |        |      |        |        |       |      | 6      |
| Bilangan ulangan              |       |        |      |        |        |       |      |        |
| Bilangan set                  |       |        |      |        |        |       |      |        |

**Nota**

Anda dikira telah melakukan 1 set senaman apabila siap melakukan 3 senaman di atas. Ulang minima 3 set sehari. Rekod di dalam jadual di atas

**Temujanji fasa 3: .....**



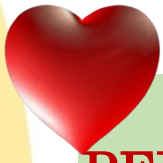

## FASA 3: SENAMAN KEKUATAN OTOT PERUT

Lakukan 3 jenis senaman ini bermula dari minggu ke-7 hingga minggu ke-8 selepas bersalin

### Senaman 1

- Baring dengan kedua kaki dibengkokkan.
- Angkat kepala dan lihat diantara kedua-dua peha. Tahan 3 saat.
- Kembali ke posisi asal.
- Ulang 10 kali.

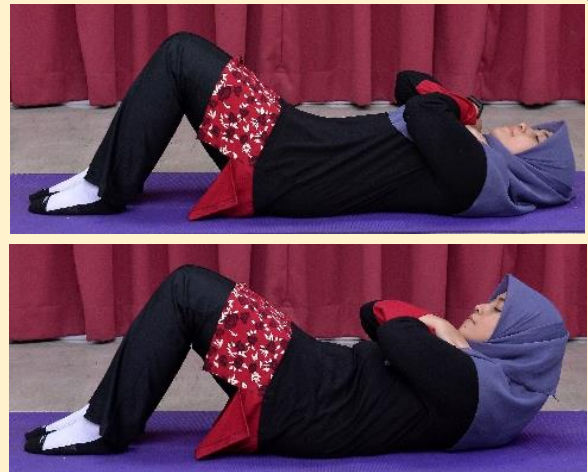

### Senaman 2

- Meniarap dengan berat di atas kedua siku.
- Tahan posisi ini seberapa lama yang mungkin.
- Guna jam untuk ukuran masa.

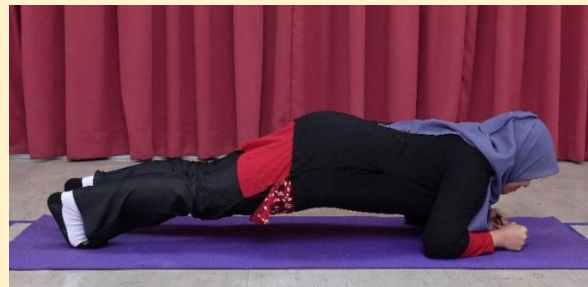

### Senaman 3

- Duduk dengan sedikit condong ke belakang dengan kedua kaki dibengkokkan.
- Gerakkan tubuh ke kanan dan ke kiri.
- Ulang 10 kali.

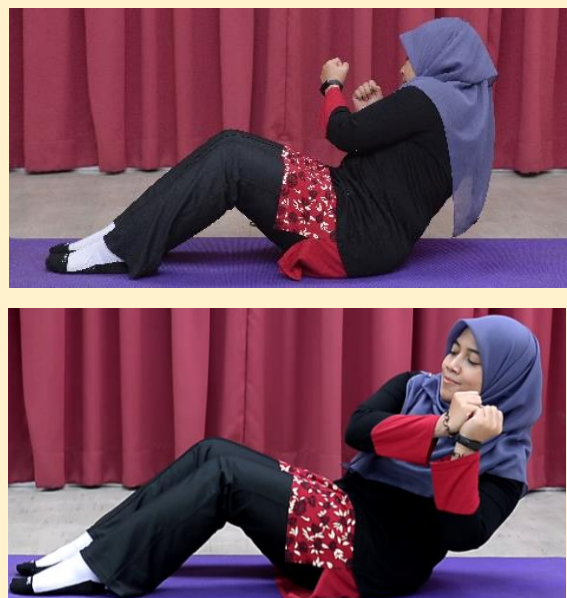



**Rekod senaman (Minima 3 kali seminggu)**

Tarikh: \_\_\_\_\_

| HARI                          | ISNIN | SELASA | RABU | KHAMIS | JUMAAT | SABTU | AHAD | MINGGU |
|-------------------------------|-------|--------|------|--------|--------|-------|------|--------|
| Tandakan ✓ hari anda bersenam |       |        |      |        |        |       |      | 7      |
| Bilangan ulangan              |       |        |      |        |        |       |      |        |
| Bilangan set                  |       |        |      |        |        |       |      |        |
| HARI                          | ISNIN | SELASA | RABU | KHAMIS | JUMAAT | SABTU | AHAD | MINGGU |
| Tandakan ✓ hari anda bersenam |       |        |      |        |        |       |      | 8      |
| Bilangan ulangan              |       |        |      |        |        |       |      |        |
| Bilangan set                  |       |        |      |        |        |       |      |        |

**Nota**

Anda dikira telah melakukan 1 set senaman apabila siap melakukan 3 senaman di atas kecuali senaman 2.

Ulang minima 3 set sehari. Rekod di dalam jadual di atas.

Rekod berapa lama anda mampu bertahan untuk senaman 2. Tambah masa anda perlahan-lahan.



Supplement: kjfm-22-0035-Supplementary-1.pdf [file kjfm-22-0035-Supplementary-1.pdf]
